# Supplementary material
Source: publisher figshare collection journal article supplement (https://asha.figshare.com/articles/dataset/_/14669664)
Supplement: Supplementary file 1 [file 1]

**Supplemental Material S2.** Western Aphasia Battery–Revised Writing scores.

| Participant | Writing Upon Request | Writing Output | Writing to Dictation | Writing Dictated Words | Alphabet and Numbers | Dictated Letters and Numbers | Copying a Sentence | Writing Total |
|-------------|----------------------|----------------|----------------------|------------------------|----------------------|------------------------------|--------------------|---------------|
| 1           | 5                    | 30             | 4                    | 5.5                    | 21                   | 5.5                          | 9                  | 80            |
| 2           | 4                    | 2              | 1.5                  | 2                      | 16.5                 | 2                            | 8                  | 36            |
| 3           | 6                    | 16             | 6                    | 10                     | 22.5                 | 7.5                          | 10                 | 78            |
| 4           | 5.5                  | 2              | 0                    | 2                      | 15                   | 4                            | 10                 | 38.5          |
| 5           | 6                    | 19             | 2                    | 3                      | 15.5                 | 7.5                          | 9.5                | 62.5          |
| 6           | 6                    | 17.5           | 1                    | 5                      | 21.5                 | 5.5                          | 9                  | 65.5          |
| 7           | 6                    | 34             | 5.5                  |                        | <i>Pro-rated</i>     |                              |                    | 91            |
| 8           | 5                    | 18             | 4                    | 6                      | 20.5                 | 6.5                          | 10                 | 70            |
| 9           | 4                    | 15             | 9.5                  | 10                     | 21                   | 5.5                          | NA                 | 67*           |
| 10          | 6                    | 10             | 0.5                  | 8                      | 21.5                 | 7.5                          | 9                  | 62.5          |
| 11          | 5                    | 9.5            | 0                    | 2                      | 19.5                 | 2                            | 10                 | 48            |
| 12          | 4                    | 3              | 0                    | 4                      | 15.5                 | 5                            | 10                 | 41.5          |
| 13          | 6                    | 32.5           | 6                    |                        | <i>Pro-rated</i>     |                              |                    | 89            |
| 14          | 5                    | 15.5           | 8                    | 6                      | 19.5                 | 7.5                          | 10                 | 71.5          |
| 15          | 4.5                  | 9              | 1                    | 1                      | 18.5                 | 3                            | 9                  | 46            |
| 16          | 6                    | 23.5           | 8                    | 10                     | 20.5                 | 7.5                          | 10                 | 85.5          |
| 17          | 5.5                  | 34             | 2                    |                        | <i>Pro-rated</i>     |                              |                    | 83            |
| 18          | 4                    | 10             | 8.5                  | 8                      | 21.5                 | 7.5                          | 10                 | 69.5          |
| 19          | 5.5                  | 21             | 1.5                  | 10                     | 22.5                 | 5.5                          | 10                 | 76            |
| 20          | 5.5                  | 15.5           | 6.5                  | 6                      | 19                   | 6                            | 8.5                | 67            |

*Note.* A pro-rated score is generated according to WAB-R test instructions when examinee scores greater than or equal to 40 on subtests A-C and further testing is discontinued. \*Although this score does not include one subtest (copying), it was used to calculate the LQ and CQ.
