# Supplementary material
Source: publisher figshare collection journal article supplement (https://asha.figshare.com/articles/dataset/_/14669664)
Supplement: Supplementary file 2 [file 1]

Code Name: \_\_\_\_\_ Date: \_\_\_\_\_

## Technology Survey

Circle your answer for each question:

1. I have a **computer**?  Yes No

2. I **use** the **computer** Daily Weekly Monthly Not at all

3. I have an **iPad/tablet**?  Yes No

4. I **use** the **iPad/tablet** Daily Weekly Monthly Not at all

5. I **have** a **smartphone**  Yes No

6. I **use** the **smartphone** Daily Weekly Monthly Not at all

7. I use **technology** to:   

|                                    |                  |                                            |
|------------------------------------|------------------|--------------------------------------------|
| Make <b>phone calls</b>            | <span>Yes</span> | <span>No</span>                            |
| <b>Email</b>                       | <span>Yes</span> | <span>No</span>                            |
| <b>Text</b>                        | <span>Yes</span> | <span>No</span> (If "Yes," see question 8) |
| <b>Shop</b>                        | <span>Yes</span> | <span>No</span>                            |
| Look up <b>information</b>         | <span>Yes</span> | <span>No</span>                            |
| <b>Connect</b> with <b>friends</b> | <span>Yes</span> | <span>No</span>                            |
| <b>Tweet</b>                       | <span>Yes</span> | <span>No</span>                            |
| <b>Take photos</b>                 | <span>Yes</span> | <span>No</span>                            |
| <b>Share photos</b>                | <span>Yes</span> | <span>No</span>                            |
| <b>Something else:</b> _____       | <span>Yes</span> | <span>No</span>                            |

8. For **sending** texts, I use:

|                |                  |                 |
|----------------|------------------|-----------------|
| Speech-to-Text | <span>Yes</span> | <span>No</span> |
| Typing         | <span>Yes</span> | <span>No</span> |

For **reading** texts sent to me, I use:

|                |                  |                 |
|----------------|------------------|-----------------|
| Text-to-Speech | <span>Yes</span> | <span>No</span> |
|----------------|------------------|-----------------|

Code Name: \_\_\_\_\_ Date: \_\_\_\_\_

9. I am **confident** in my ability to use my **computer**.

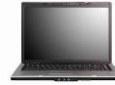

|   |   |   |   |   |   |   |   |   |    |
|---|---|---|---|---|---|---|---|---|----|
| 1 | 2 | 3 | 4 | 5 | 6 | 7 | 8 | 9 | 10 |
|---|---|---|---|---|---|---|---|---|----|

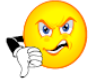

Not at all

Somewhat

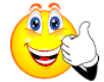

Very much

10. I am **confident** in my ability to use my **iPad/tablet**.

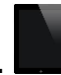

|   |   |   |   |   |   |   |   |   |    |
|---|---|---|---|---|---|---|---|---|----|
| 1 | 2 | 3 | 4 | 5 | 6 | 7 | 8 | 9 | 10 |
|---|---|---|---|---|---|---|---|---|----|

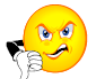

Not at all

Somewhat

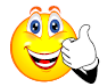

Very much

11. I am **confident** in my ability to use my **smartphone**.

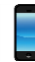

|   |   |   |   |   |   |   |   |   |    |
|---|---|---|---|---|---|---|---|---|----|
| 1 | 2 | 3 | 4 | 5 | 6 | 7 | 8 | 9 | 10 |
|---|---|---|---|---|---|---|---|---|----|

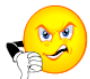

Not at all

Somewhat

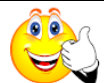

Very much

12. I am **confident** in my ability to **text**.

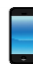

|   |   |   |   |   |   |   |   |   |    |
|---|---|---|---|---|---|---|---|---|----|
| 1 | 2 | 3 | 4 | 5 | 6 | 7 | 8 | 9 | 10 |
|---|---|---|---|---|---|---|---|---|----|

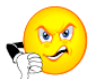

Not at all

Somewhat

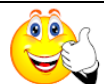

Very much
